# Supplementary material for: Smac mimetics and oncolytic viruses synergize in driving anticancer T-cell responses through complementary mechanisms
Source: PubMed Central journal article supplement (PMC5570934; doi:10.1038/s41467-017-00324-x), 2017-08-24
Supplement: 41467_2017_324_MOESM1_ESM.pdf [file 41467_2017_324_MOESM1_ESM.pdf]

### **Description of Supplementary Files**

File Name: Supplementary Information

Description: Supplementary Figures and Supplementary Table

File Name: Peer Review File

Description:

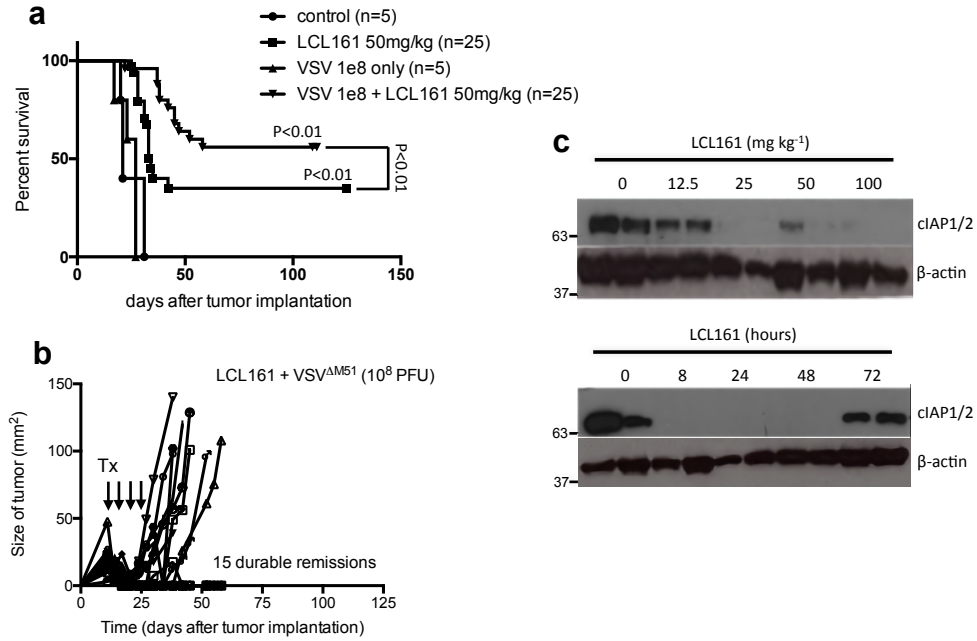

2

3 **Supplementary Figure 1.** LCL161±VSV<sup>ΔM51</sup> therapy can elicit complete and durable EMT6 tumour  
 4 control in Balb/c mice. **(a)** Overall survival of EMT6 tumour-bearing mice in response to the indicated  
 5 treatments (triplicate experiments; log-rank test). **(b)** EMT6 tumour growth rate in response to  
 6 LCL161+VSV<sup>ΔM51</sup> combination therapy, measured by skin calipers. **(c)** cIAP1/2 protein in EMT6  
 7 tumours extracted from mice treated with LCL161, detected by immunoblots (n=2 biological replicates  
 8 per experiment, duplicate experiments).

9

10

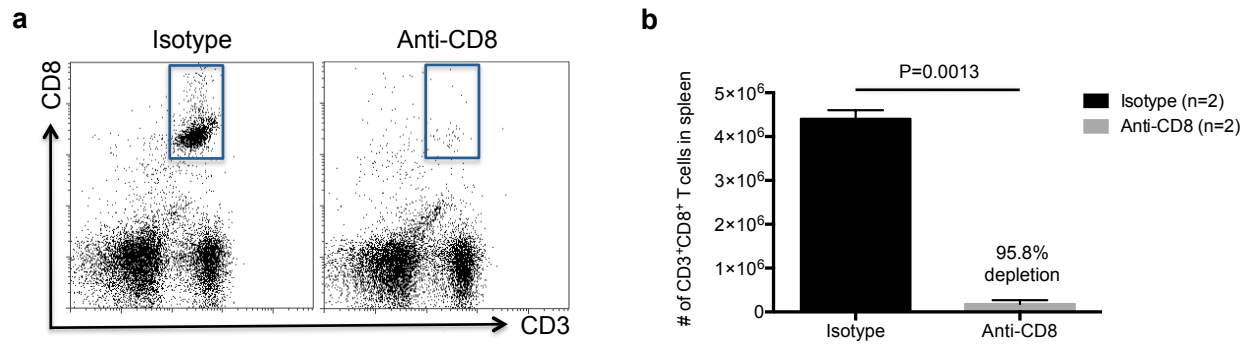

11

12 **Supplementary Figure 2.** Flow cytometry for CD8<sup>+</sup> T cells following neutralizing antibody treatment.

13 **(a)** Representative flow cytometry dot plots of splenic CD3<sup>+</sup>/CD8<sup>+</sup> T cells. **(b)** Splenic CD3<sup>+</sup>CD8<sup>+</sup> T

14 cells 3 days after αCD8 (or isotype) antibody treatment, measured by flow cytometry (duplicate

15 experiments; mean±SD; *t*-test).

16

17

18

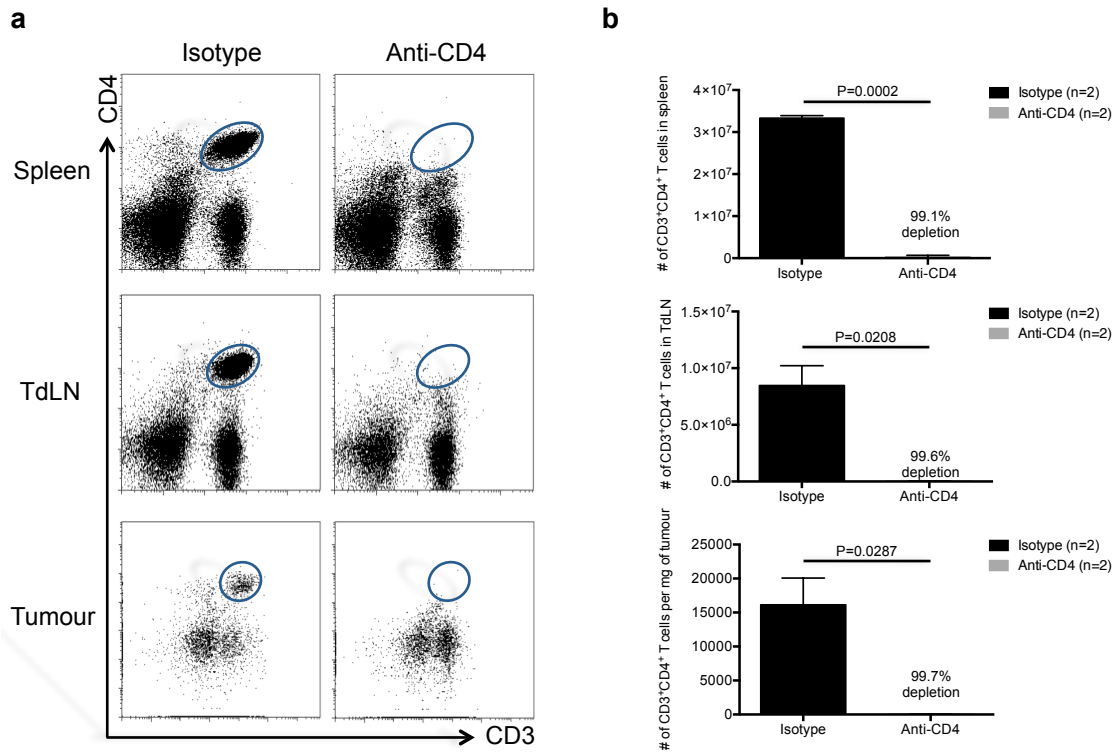

19

20 **Supplementary Figure 3.** Flow cytometry for CD4<sup>+</sup> T cells following neutralizing antibody treatment.  
 21 **(a-c)** Representative flow cytometry dot plots of CD3<sup>+</sup>CD4<sup>+</sup> T cells in spleen (a), TdLN (b) and EMT6  
 22 tumour (c). **(d-f)** Splenic CD3<sup>+</sup>CD4<sup>+</sup> T cells in spleen (d), TdLN (e) and EMT6 tumour (f) 3 days after  
 23  $\alpha$ CD4 (or isotype) antibody treatment initiation, measured by flow cytometry (single experiment;  
 24 mean $\pm$ SD; *t*-test).

25

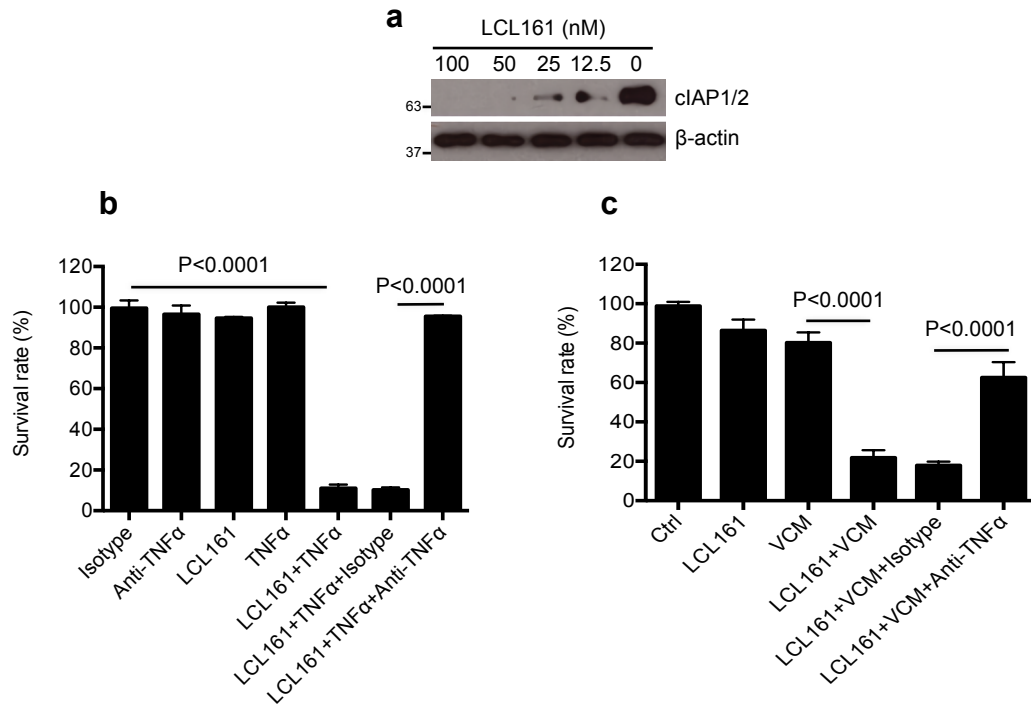

26

27 **Supplementary Figure 4.** LCL161 treatment leads to cIAP1/2 depletion and sensitizes EMT6 cells to  
 28 TNF $\alpha$ -mediated cell death. **(a)** cIAP1/2 protein in EMT6 cells after treatment with LCL161 for 2 hours,  
 29 detected by immunoblots (n=2 biological replicates, duplicate experiments). **(b)** EMT6 cell viability 48  
 30 hours after LCL161 $\pm$ recombinant TNF $\alpha$  (100 ng mL $^{-1}$ )  $\pm$  neutralizing antibody (TNF $\alpha$  or control),  
 31 measured by Alamar Blue (n=3 biological replicates, duplicate experiments; mean $\pm$ SD; ANOVA with  
 32 Tukey's multiple comparisons test). **(c)** EMT6 cell viability 48 hours after LCL161 $\pm$ virus-conditioned  
 33 media (VCM) $\pm$ neutralizing antibody (TNF $\alpha$  or control), measured by Alamar Blue (n=3 biological  
 34 replicates per experiment, duplicate experiments; mean $\pm$ SD; ANOVA with Tukey's multiple  
 35 comparisons test).

36

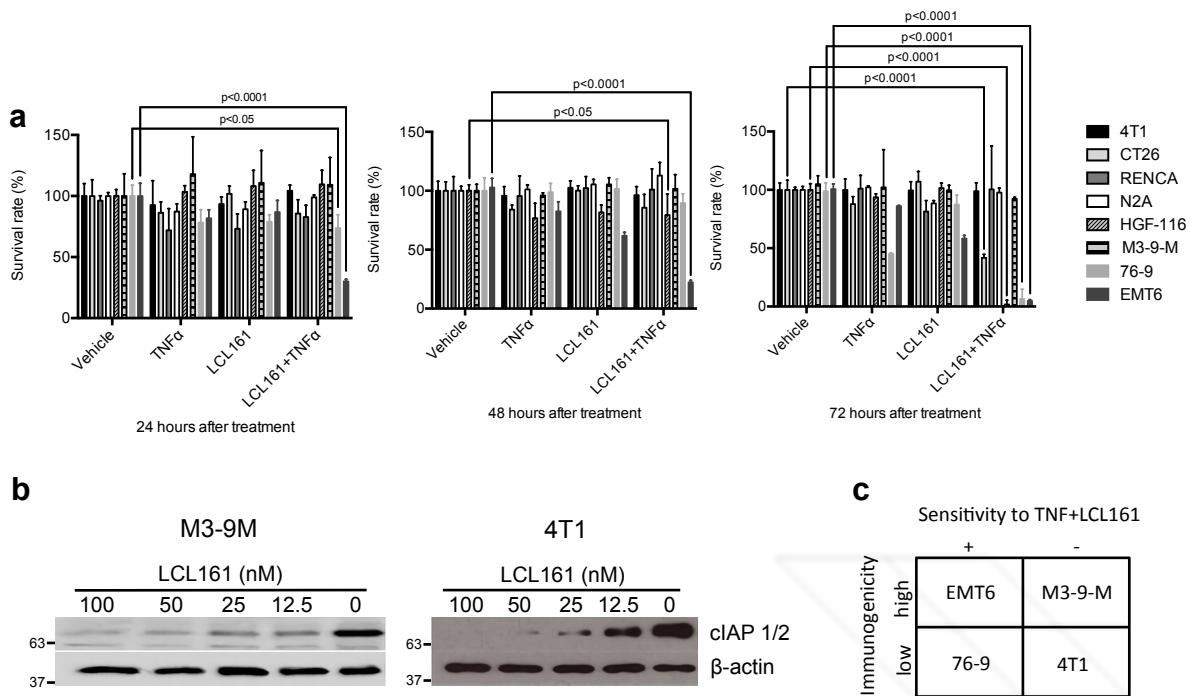

37

38 **Supplementary Figure 5.** Most mouse cancer cell lines are not sensitized to TNF $\alpha$ -mediated death by  
 39 LCL161. **(a)** Cell viability 24, 48 and 72 hours after LCL161+recombinant TNF $\alpha$  treatment, measured  
 40 by Alamar Blue (n=3 biological replicates per experiment, duplicate experiments; mean $\pm$ SD; ANOVA  
 41 with Tukey's multiple comparisons test). **(b)** cIAP1/2 protein in M3-9-M and 4T1 cells treated with  
 42 LCL161 for 2 hours, detected by immunoblots (n=2 biological replicates per experiment, single  
 43 experiment). **(c)** Tabular representation of sensitivity to LCL161+ TNF $\alpha$  versus immunogenicity for  
 44 the mouse cancer cell lines chosen for analysis *in vivo*.

45

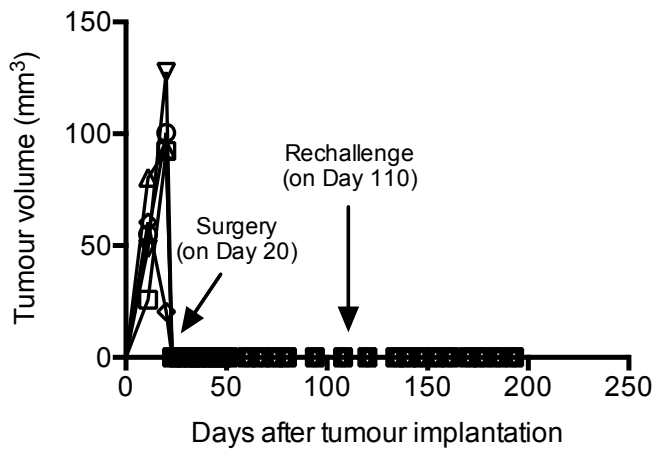

46

47 **Supplementary Figure 6.** EMT6 tumours are highly immunogenic. 12 day old EMT6 tumour-bearing  
48 mice underwent surgical resection and, 90 days later, rechallenged with 1e5 EMT6 cells. Tumour  
49 growth was monitored and plotted (single experiment).

50

51

52

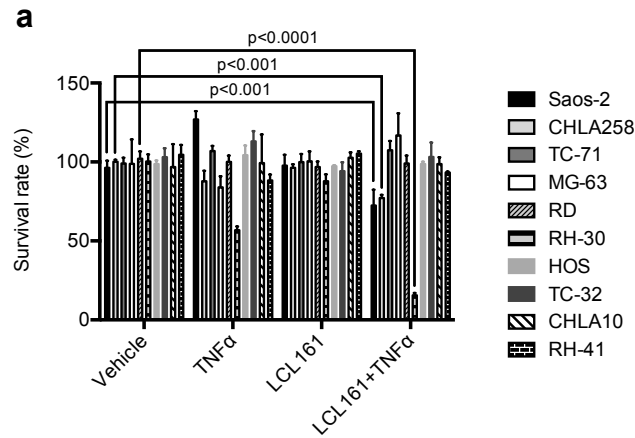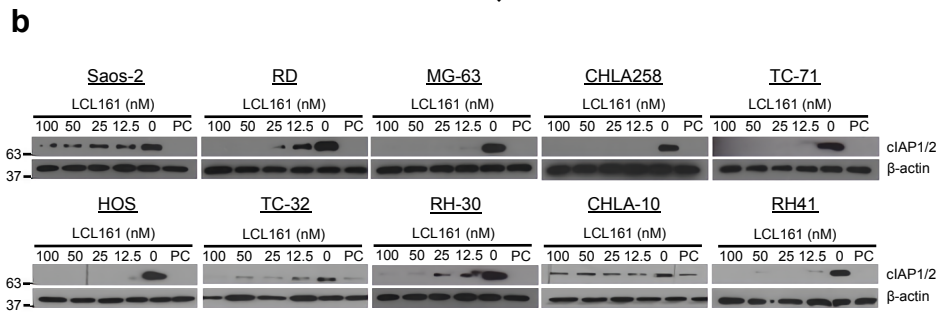

53

54 **Supplementary Figure 7.** Most human pediatric sarcoma lines are not sensitized to TNF  $\alpha$ -mediated  
 55 death by LCL161. **(a)** Viability of human pediatric sarcoma cells 48 hours after LCL161±recombinant  
 56 TNF $\alpha$  treatment, measured by Alamar Blue (n=3 biological replicates per experiment, duplicate  
 57 experiments; mean±SD; ANOVA with Tukey's multiple comparisons test). **(b)** cIAP1/2 protein in  
 58 human pediatric sarcoma cells treated with LCL161 for 2 hours, detected by immunoblots (n=2  
 59 biological replicates, single experiment).

60

61

62

63

64



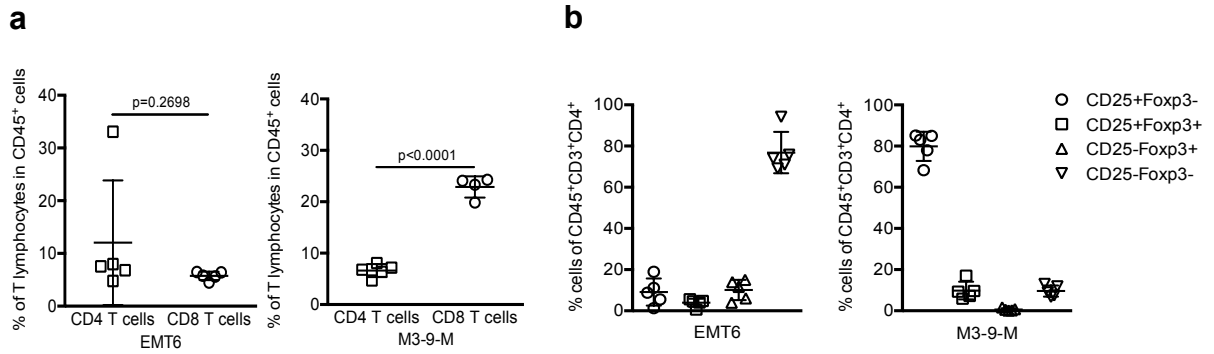

65

66 **Supplementary Figure 8.** Divergent CD4<sup>+</sup> polarization in EMT6 vs. M3-9-M tumours. **(a)** Total  
 67 number of CD8<sup>+</sup> and CD4<sup>+</sup> T cells infiltrating 12 day old EMT6 or M3-9-M tumours, measured by  
 68 flow cytometry (duplicate experiments; mean±SD; *t*-test). **(b)** Relative number of CD4<sup>+</sup> T cells  
 69 expressing CD25 and/or Foxp3 polarization markers (duplicate experiment; mean±SD; ANOVA with  
 70 Tukey's multiple comparisons test).

71

72

73

74

75

76

77

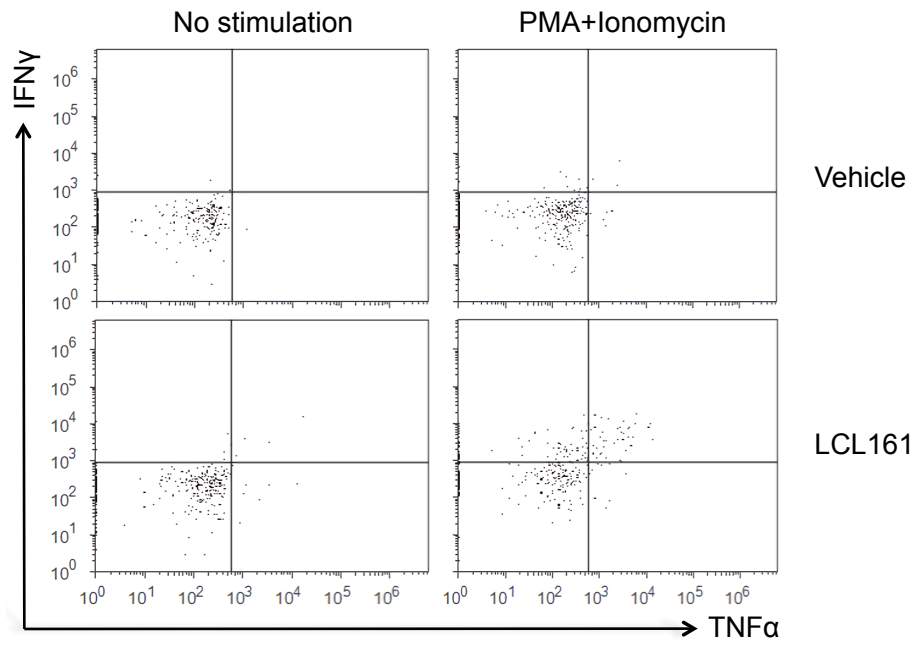

78

79 **Supplementary Figure 9.** Flow cytometry for intracellular cytokine staining in tumour-infiltrating  
 80  $CD8^+$  T cells. Representative dot plots of  $IFN\gamma^-$  or  $TNF\alpha^-$  or  $IFN\gamma/TNF\alpha^-$  positive cells within the  
 81  $CD45^+CD3^+CD8^+$  leukocyte fraction isolated from EMT6 tumours.

82

83

84

85

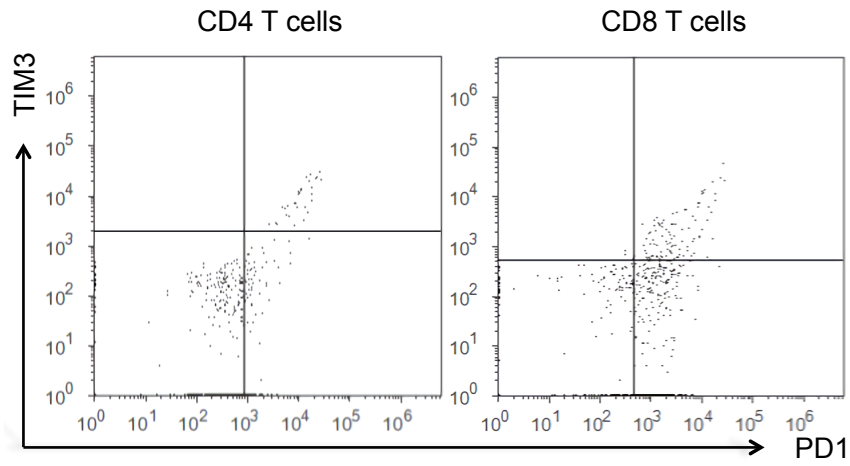

86

87 **Supplementary Figure 10.** Representative dot plots of PD-1 or Tim-3 or PD-1/Tim-3- positive cells  
88 within the CD45<sup>+</sup>CD3<sup>+</sup>CD8<sup>+</sup> leukocyte fraction isolated from EMT6 tumours.

89

90

91

92

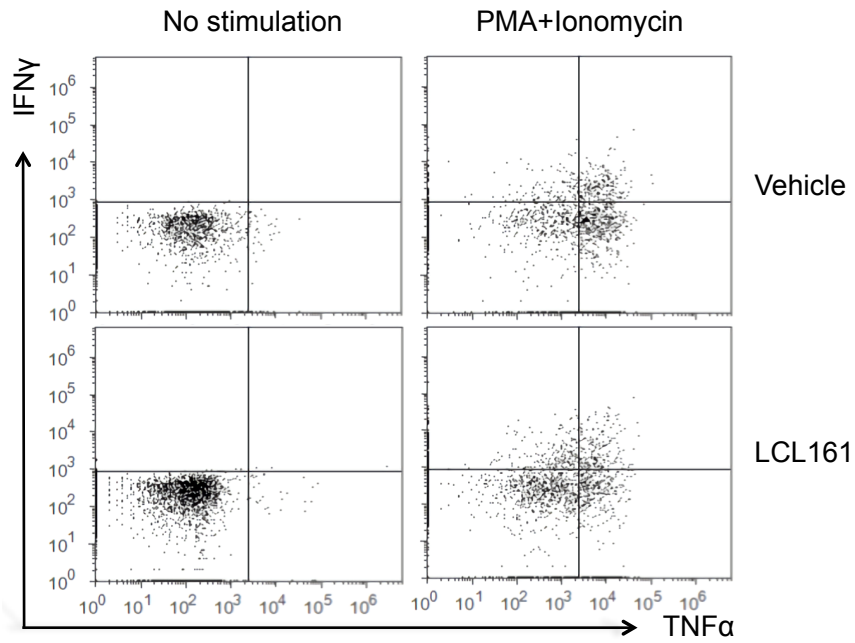

93

94 **Supplementary Figure 11.** Flow cytometry for intracellular cytokine staining in TdLN CD8<sup>+</sup> T cells.

95 Representative dot plots of IFN $\gamma$ - or TNF $\alpha$ - or IFN $\gamma$ /TNF $\alpha$ - positive cells within the CD45<sup>+</sup>CD3<sup>+</sup>CD8<sup>+</sup>

96 fraction isolated from EMT6 TdLN.

97

98

99

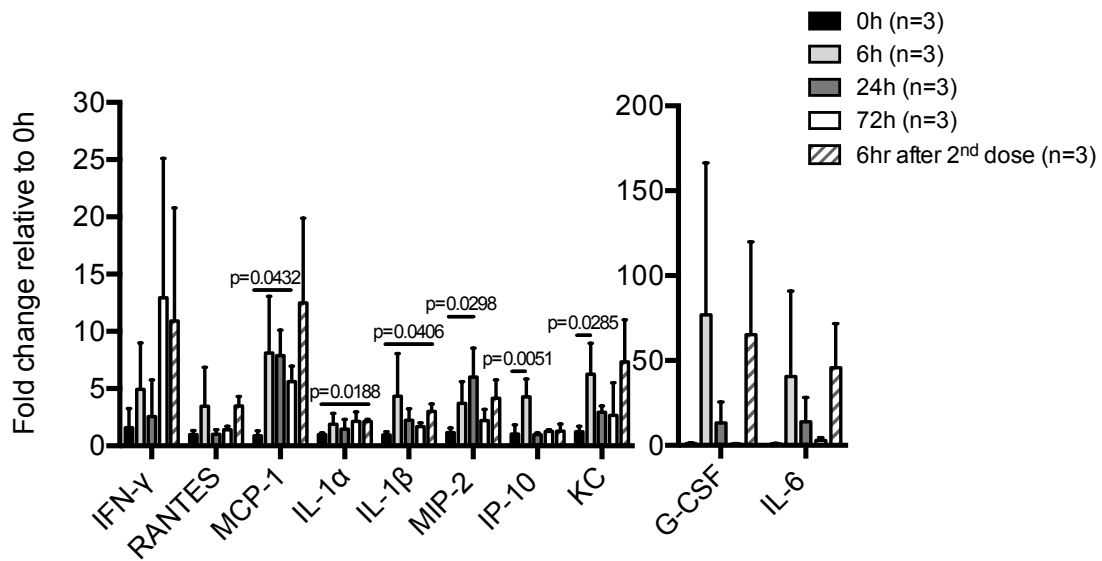

100

101 **Supplementary Figure 12.** LCL161 alters the cytokine milieu within EMT6<sup>TNFR1<sup>-/-</sup></sup> tumours (clone 2-  
 102 10) toward an immunostimulatory cytokine signature. Cytokine expression within the interstitial fluid  
 103 of EMT6 tumours, measured by Luminex (n=3 biological replicates; single experiment; mean±SD;  
 104 ANOVA with Tukey's multiple comparisons test).

105

106

107

108

109

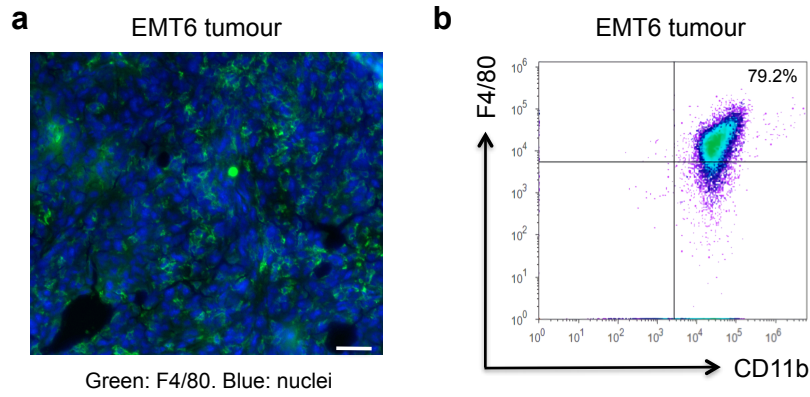

110

111 **Supplementary Figure 13.** EMT6 tumours are highly enriched with macrophages. **(a)** Representative  
112 immunofluorescence staining of F4/80<sup>+</sup> macrophages in EMT6 tumours. Green: F4/80. Blue: nuclei  
113 (DAPI). Scale bar=50µM. **(b)** Representative flow cytometry dot plot for CD11b<sup>+</sup>F4/80<sup>+</sup> cells within  
114 the CD45<sup>+</sup> fraction isolated from EMT6 tumours (n=4 biological replicates per experiment, duplicate  
115 experiments).

116

117

118

119

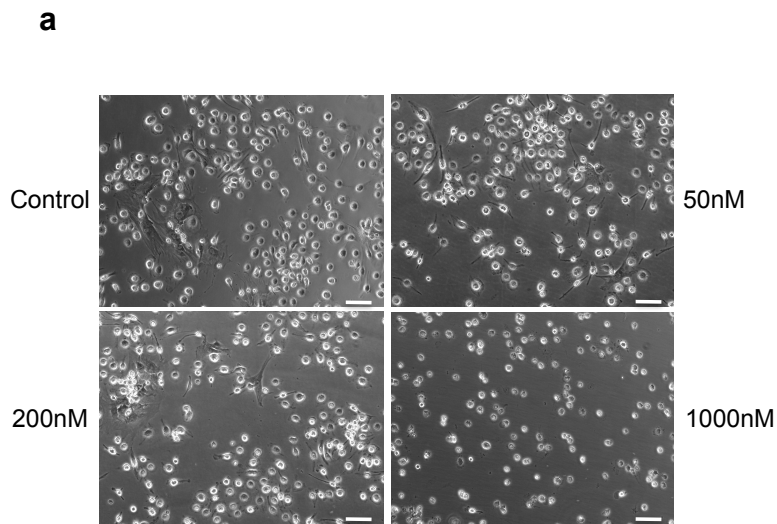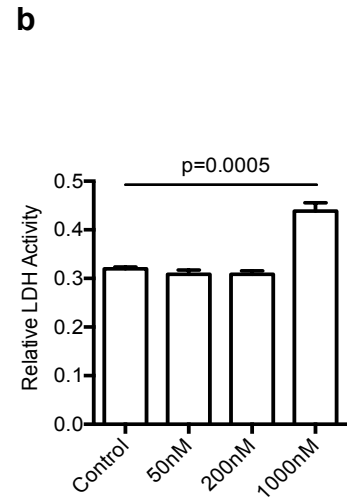

120

121 **Supplementary Figure 14.** LCL161 treatment reduces BMDM viability. **(a)** Representative brightfield  
 122 images of cultured BMDM treated with LCL161 for 48 hours. Scale bar=50 $\mu$ M. **(b)** LDH activity in  
 123 BMDMs treated with LCL161 for 48 hours at the indicated concentrations (n=3 biological replicates,  
 124 duplicate experiments; mean $\pm$ SD; ANOVA with Tukey's multiple comparisons test).

125

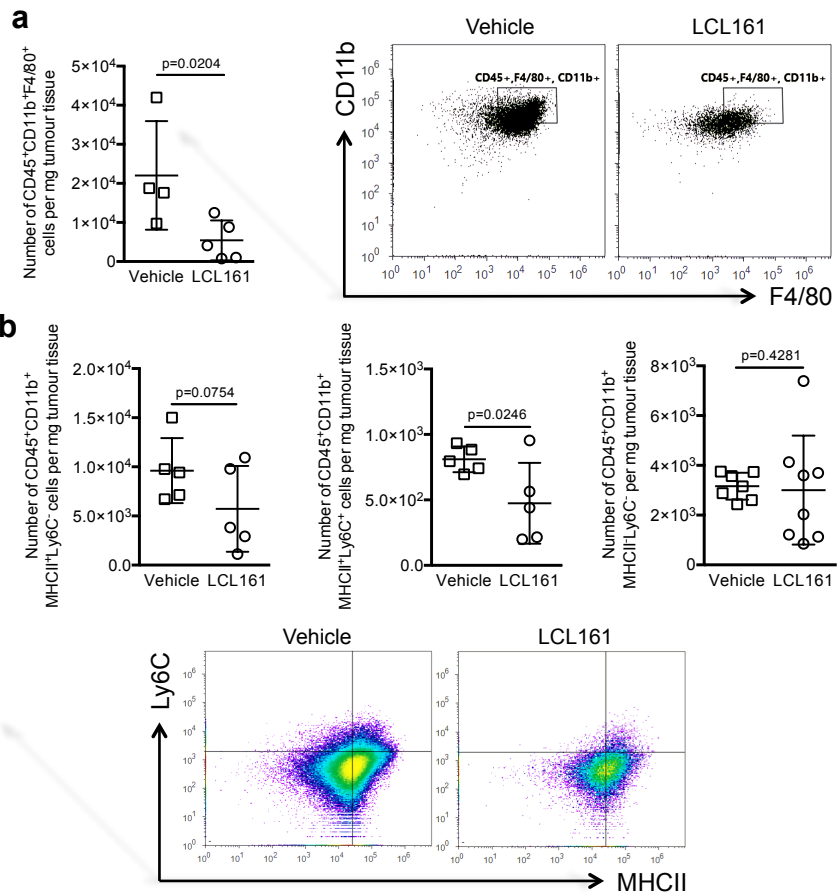

126

127 **Supplementary Figure 15.** LCL161 treatment reduces TAMs in EMT6 tumours. **(a) Left panel:** Total  
 128 number of CD45<sup>+</sup>CD11b<sup>+</sup>F4/80<sup>+</sup> in EMT6 tumours 72 hours after LCL161 (or vehicle) treatment,  
 129 measured by flow cytometry (triplicate experiments; mean±SD; *t*-test). **Right panel:** Representative dot  
 130 plots. **(b) Top panel:** Total number of CD45<sup>+</sup>CD11b<sup>+</sup>MHC-II<sup>+</sup>Ly6C<sup>±</sup> in EMT6 tumours 72 hours after  
 131 LCL161 (or vehicle) treatment, measured by flow cytometry (triplicate experiments; mean±SD; *t*-test).  
 132 **Bottom panel:** Representative dot plots.

133



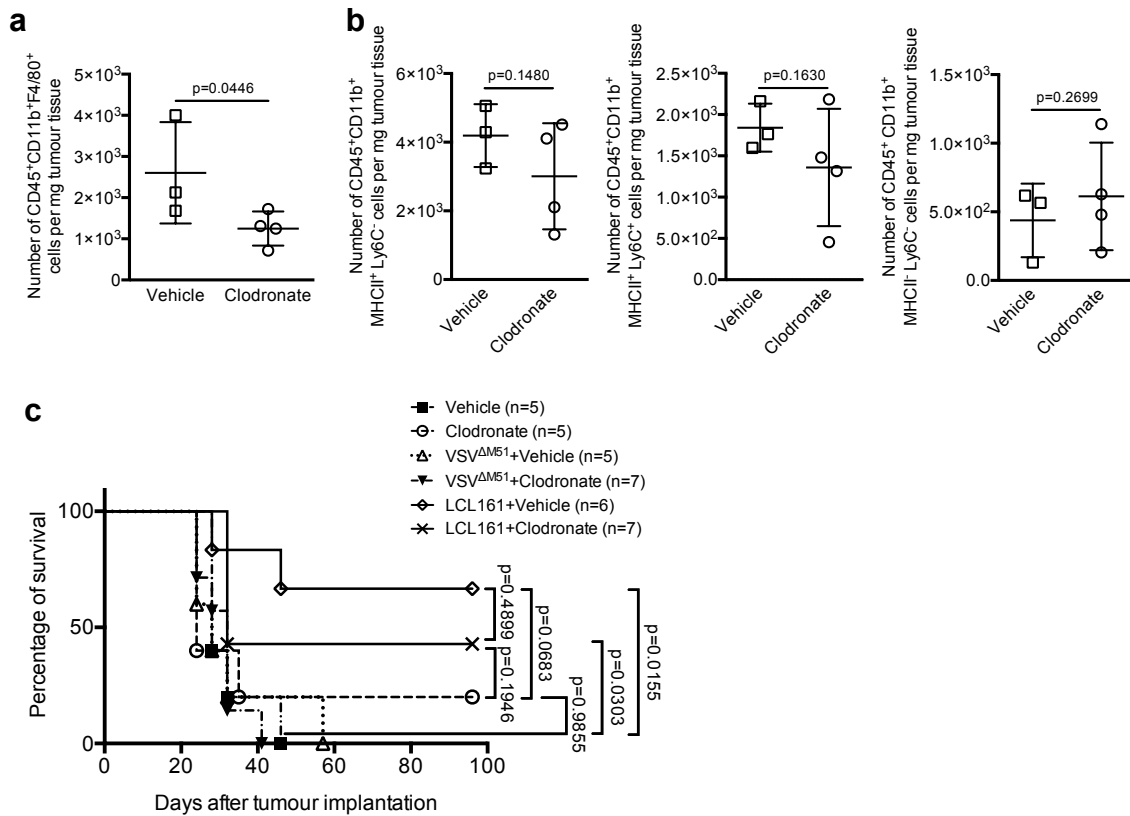

134

135 **Supplementary Figure 16.** Clodronate liposome-mediated TAM depletion does not phenocopy  
 136 LCL161 therapy. **(a)** Total number of CD45<sup>+</sup>CD11b<sup>+</sup>F4/80<sup>+</sup> in EMT6 tumours 7 days after CL (or  
 137 vehicle) treatment, measured by flow cytometry (single experiment; mean±SD; *t*-test). **(b)** Total  
 138 number of CD45<sup>+</sup>CD11b<sup>+</sup>MHC-II<sup>±</sup>Ly6C<sup>±</sup> in EMT6 tumours 7 days after CL (or vehicle) treatment,  
 139 measured by flow cytometry (single experiment; mean±SD; *t*-test). **(c)** Overall survival of EMT6  
 140 tumour bearing mice treated with the indicated therapies beginning on day 12. (single experiment; log-  
 141 rank test)

142

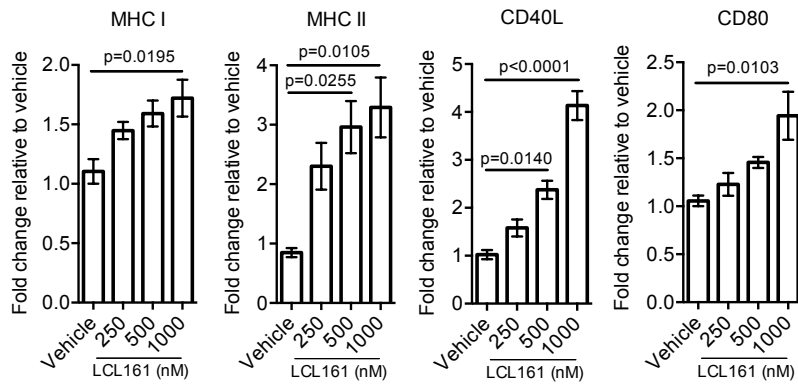

143

144 **Supplementary Figure 17.** LCL161 causes upregulation of MHC and co-stimulatory proteins on  
 145 macrophages. BMDMs were treated with the indicated concentrations of LCL161 (or vehicle) for 20  
 146 hours prior to flow cytometry for MHC-I, MHC-II, CD40L and CD80 (n=3 biological replicates,  
 147 duplicate experiments; mean±SD; ANOVA with Tukey's multiple comparisons test).

148

149

150

151

152

153

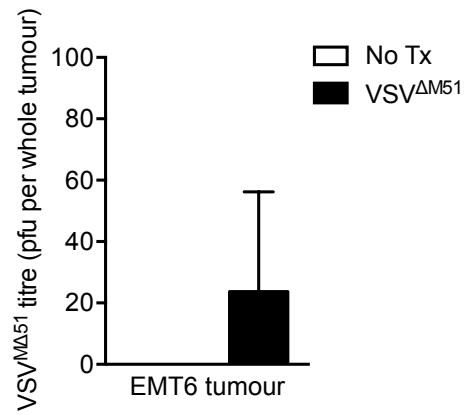

154

155 **Supplementary Figure 18.** Systemic delivery of VSV $\Delta$ M51 leads to a small infection of EMT6  
156 tumours. 12 day old EMT6 tumour-bearing mice were treated with VSV $\Delta$ M51( $1 \times 10^8$  PFU) i.v. and 12  
157 hours later infectious particles measured in tumours by plaque assay (n=3 biological replicates; single  
158 experiment; mean $\pm$ SD).

159

160

161

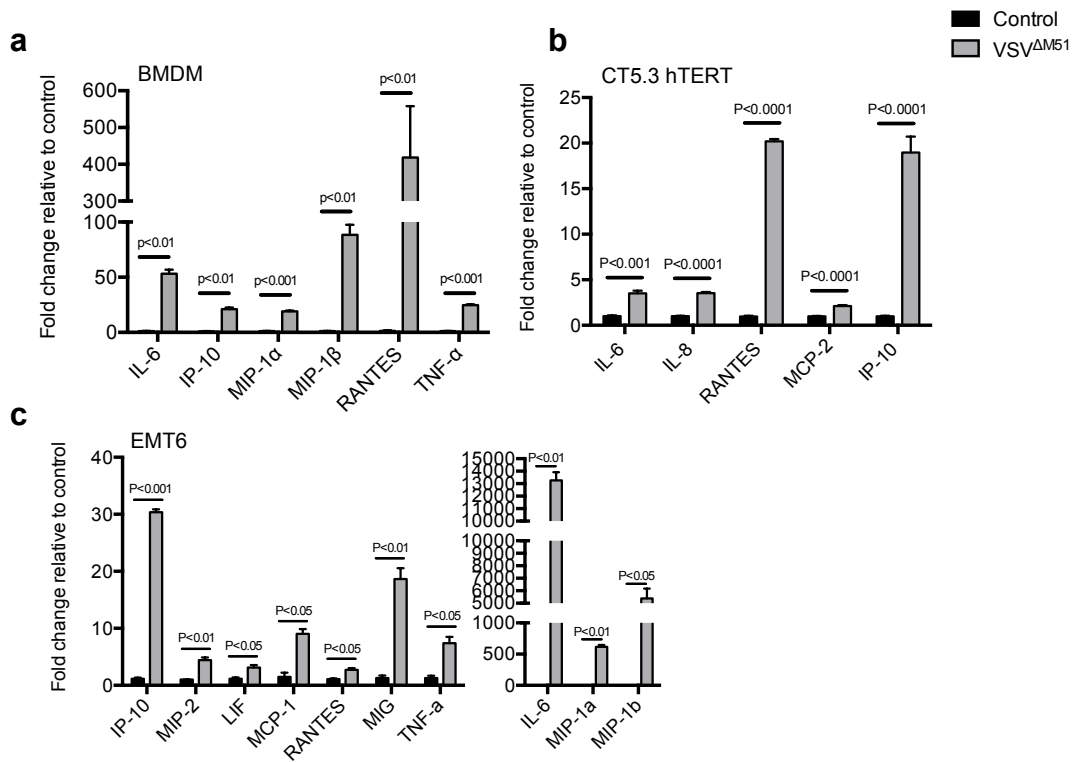

162

163 **Supplementary Figure 19.** VSV $\Delta$ M51 elicits cytokine secretion from cancer and normal cells *in vitro*.

164 **(a-c)** Immunostimulatory cytokines measured from EMT6 **(a)**, MOI=0.1, 48 hpi), BMDM **(b)**, MOI=10,

165 24 hpi) and cancer-associated fibroblasts (CT5.3 hTERT, **c**, MOI=0.1, 48 hpi) culture after infection

166 with VSV $\Delta$ M51 (n=3 biological replicates, single experiment; mean $\pm$ SD; *t*-test).

167

168

169

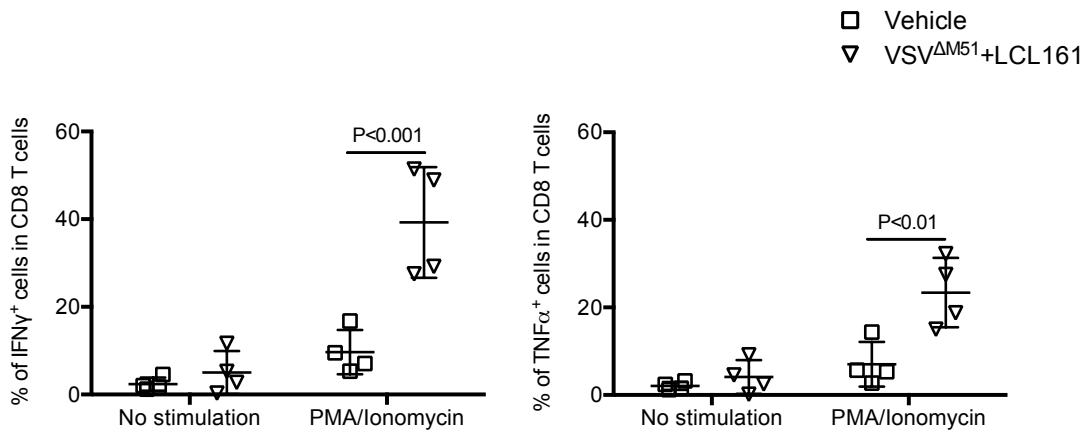

170 **Supplementary Figure 20.** LCL161 rejuvenates tumour-infiltrating T cells in mice bearing

171 EMT6<sup>TNFR1<sup>-/-</sup></sup> tumours. Intracellular staining for IFN $\gamma$  or TNF $\alpha$  within CD8<sup>+</sup> T cells isolated from

172 EMT6<sup>TNFR1<sup>-/-</sup></sup> tumours (clone 2-10) and stimulated with PMA and ionomycin *ex vivo*, measured by flow

173 cytometry (single experiment; mean $\pm$ SD; ANOVA with Bonferroni's multiple comparisons test).

174

175

176

177

178

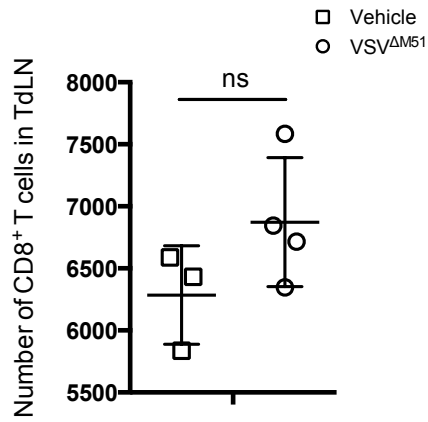

179

180 **Supplementary Figure 21.** VSV<sup>ΔM51</sup> has no effect on the number of CD8<sup>+</sup> T cells within the TdLN.

181 CD8<sup>+</sup> T cells within EMT6 TdLN 7 days after LCL161 (or vehicle) treatment initiation, measured by

182 flow cytometry (duplicate experiments; mean±SD; *t*-test).

183

184

185

186

187

188

189

190

191

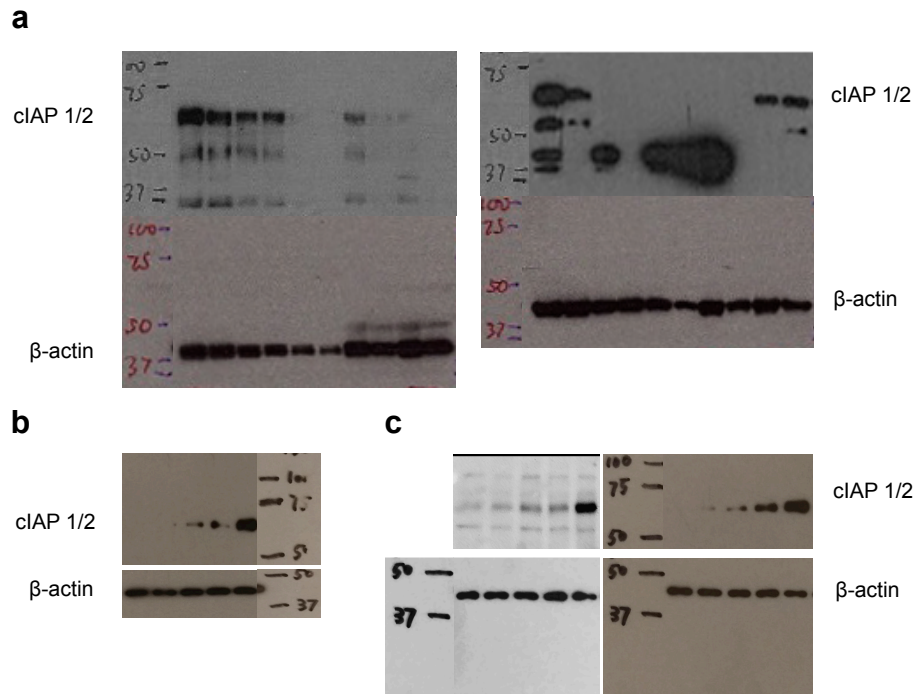

192

193 **Supplementary Figure 22.** Whole blots shown in (a) Supplementary Fig. 1c, (b) Supplementary Fig.

194 4a, (c) and Supplementary Fig. 5b

195

196

197

198

199

200

201

202

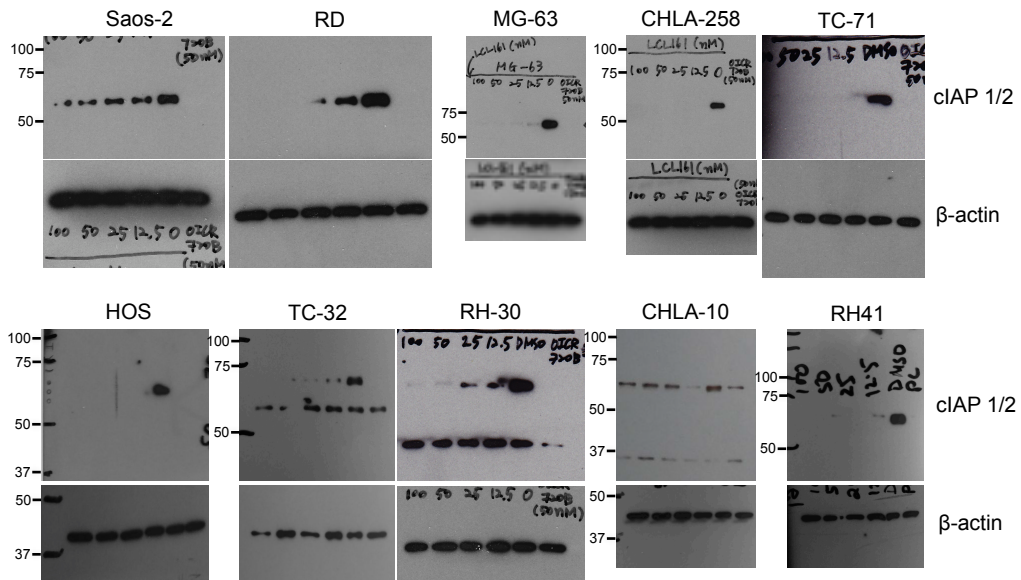

203

204 **Supplementary Figure 23.** Whole blots shown in Supplementary Fig. 7

205

206

207



| Gene of Interest               | Annealing Temp | Forward primer (5'-3')   | Reverse primer (5'-3')    |
|--------------------------------|----------------|--------------------------|---------------------------|
| <i>GAPDH</i>                   | 55.7           | CACGGCAAATTCAACGGCACAGT  | TGGGGGCATCGGCAGAAGG       |
| <i>IFN <math>\alpha</math></i> | 57             | CTTCCACAGGATACTGTGTACCT  | TTCTGCTCTGACCACCCTCCC     |
| <i>IFN <math>\beta</math></i>  | 57             | ATGAGTGGTGGTTGCAGGC      | TGACCTTTCAAATGCAGTAGATTCA |
| <i>IRF7</i>                    | 59             | AGCAAGACCGTGTTTACGAC     | AGTGCTGAAGTCGAAGATGG      |
| <i>OAS</i>                     | 63.3           | GCCATTGCACGCTCGCCTACTAC  | CTCCTGCCATCCGGGTTTTTCA    |
| <i>STAT1</i>                   | 55             | CTGAATATTTCCCTCCTGGG     | TCCCGTACAGATGTCCATGAT     |
| <i>Mx2</i>                     | 57             | CCTGCCTGCCATCGCTGTC      | GCCTCTCCACTCCTCTCCCTCATT  |
| <i>iNOS</i>                    | 55             | TTTGCTTCCATGCTAATGCGAAAG | GCTCTGTTGAGGTCTAAAGGCTCCG |
| <i>Arg1</i>                    | 60.9           | AGGGTTACGGCCGGTGGAGAG    | CCCCTCCTCGAGGCTGTCCTTTT   |

208 **Supplementary Table 1.** Annealing temperatures and primer sequences used each gene specific semi-  
209 quantitative RT-PCR amplification

210
